# Supplementary material
Source: HighWire-hosted journal article supplement (https://lupus.bmj.com/content/6/1/e000328)
Supplement: inline-supplementary-material-1 [file inline-supplementary-material-1.docx]

Supplementary Tables 1 & 2

**Table1**

**Gene Spring Analysis: Lesional CDLE compared to non-lesional CDLE (upregulated genes)**

| **Genesymbol** | **p ([Lesional] Vs [Nonlesional])** | **FC ([Lesional] Vs [Nonlesional])** |
| --- | --- | --- |
| SERPINB4|SERPINB3 | 5.65E-04 | 16.280832 |
| **CXCL10** | **0.002935166** | **11.498913** |
| SERPINB3 | 0.004059397 | 9.685829 |
| IFI6 | 0.011814934 | 6.804508 |
| CCL2 | 1.70E-04 | 5.783504 |
| **OAS2** | **0.001813856** | **5.239834** |
| **CXCL9** | **0.010397015** | **4.8399014** |
| IFI44 | 0.002820754 | 4.3889413 |
| PARP14 | 0.001655706 | 3.8140683 |
| KRT1 | 1.39E-04 | 3.8028188 |
| **MX1** | **0.009128628** | **3.778127** |
| HCP5 | 4.76E-05 | 3.7041047 |
| **IFI27** | **0.002199571** | **3.6539521** |
| IFITM1 | 0.001256755 | 3.4307578 |
| **XAF1** | **0.004092823** | **3.3387175** |
| S100A9 | 0.007113138 | 3.2945118 |
| S100A7A | 0.010842656 | 3.2924042 |
| **BST2** | **0.006307754** | **3.176584** |
| IFI44L | 0.005958239 | 3.1036184 |
| HLA-DRA | 0.004081528 | 3.0545595 |
| **OAS1** | **0.009118075** | **2.888252** |
| HLA-DRA | 0.003578607 | 2.7963932 |
| HLA-DRA | 0.003578607 | 2.7963932 |
| HLA-DRA | 0.003578607 | 2.7963932 |
| S100A8 | 0.005283105 | 2.7920303 |
| **OAS3** | **0.005061029** | **2.7834568** |
| HLA-DRA | 0.003490527 | 2.7819116 |
| **SAMHD1** | **5.04E-04** | **2.767689** |
| HLA-DRA | 0.003369548 | 2.7503283 |
| IFIT3 | 0.005566549 | 2.7219176 |
| HLA-DRA | 0.004366183 | 2.6295536 |
| DDX60 | 0.002803257 | 2.5786207 |
| IFIT1 | 0.015124273 | 2.5564954 |
| SAMD9L | 0.001675093 | 2.5199673 |
| DTX3L | 6.81E-04 | 2.4824953 |
| **STAT1** | **0.002905679** | **2.4735734** |
| AMTN | 0.037327692 | 2.4641047 |
| **B2M** | **3.51E-05** | **2.433792** |
| HERC6 | 0.004866982 | 2.3442764 |
| IFITM3 | 0.011463302 | 2.3412604 |
| PARP9 | 0.004678676 | 2.3393939 |
| YME1L1|TRAJ35 | 0.009904319 | 2.3302624 |
| **CXCL11** | **0.021884652** | **2.2996397** |
| KLHDC7B | 0.002133437 | 2.2957933 |
| SRGN | 4.79E-04 | 2.2939487 |
| HLA-A | 4.08E-04 | 2.29211 |
| IFITM4P | 0.004848189 | 2.2742615 |
| TRANK1 | 2.41E-04 | 2.2466452 |
| GBP4 | 0.003937658 | 2.2174556 |
| **TAP1** | **4.30E-04** | **2.2079177** |
| DDX60L | 0.003420021 | 2.1953275 |
| PLSCR1 | 0.001594494 | 2.1899688 |
| **C3** | **0.001896766** | **2.174932** |
| IFI16 | 3.77E-04 | 2.1593807 |
| CD74 | 8.92E-04 | 2.156795 |
| **IFIH1** | **0.003209878** | **2.1386745** |
| **GBP1** | **0.001270205** | **2.135973** |
| **TLR3** | **8.45E-05** | **1.7498074** |

**Table 2**

**Gene Spring analysis: Lesional CDLE compared to healthy (upregulated genes)**

HLA genes not shown

| **Gene symbol** | **p ([Lesion CDLE] Vs [Healthy])** | **FC ([Lesion CDLE] Vs [Healthy])** |
| --- | --- | --- |
| SERPINB4|SERPINB3 | 0.001699036 | 17.094643 |
| IFI6 | 7.63E-04 | 15.586993 |
| **CXCL10** | **0.016717756** | **12.3788595** |
| XIST | 0.020534819 | 9.390607 |
| **OAS2** | **0.001145915** | **8.63814** |
| CCL2 | 3.77E-04 | 8.535642 |
| IFI44 | 0.002087783 | 7.1616735 |
| **MX1** | **0.002663414** | **6.811425** |
| SERPINB3 | 0.024730686 | 6.657863 |
| PARP14 | 3.43E-04 | 6.221339 |
| IFITM1 | 1.35E-04 | 5.9054346 |
| **IFI27** | **2.64E-04** | **5.89355** |
| HCP5 | 1.89E-05 | 5.825544 |
| S100A9 | 0.002653075 | 4.9055505 |
| **XAF1** | **0.001404435** | **4.725811** |
| S100A8 | 4.27E-05 | 4.64015 |
| S100A7A | 0.01538163 | 4.602613 |
| **OAS1** | **0.001872095** | **4.4757795** |
| **OAS3** | **0.003375308** | **4.014329** |
| **B2M** | **4.41E-06** | **3.991748** |
| **BST2** | **0.015155737** | **3.9294581** |
| IFI44L | 0.017608652 | 3.7291396 |
| DDX60 | 0.001632438 | 3.7072353 |
| SAMD9L | 0.001166593 | 3.5558276 |
| KRT1 | 0.003645342 | 3.4431036 |
| **SAMHD1** | **9.21E-04** | **3.379835** |
| **STAT1** | **0.001294428** | **3.3291726** |
| DTX3L | 3.77E-04 | 3.199464 |
| IFIT3 | 0.009472629 | 3.1872292 |
| PARP9 | 0.00379229 | 3.0739207 |
| IFIT1 | 0.019843906 | 3.0671434 |
| IFITM3 | 0.002175413 | 3.0616984 |
| LGALS3BP | 7.10E-04 | 2.948241 |
| IFITM4P | 0.001924164 | 2.9383457 |
| EIF2AK2 | 0.001332098 | 2.935093 |
| IFI16 | 1.12E-04 | 2.8851235 |
| **C3** | **3.95E-04** | **2.8292658** |
| DDX60L | 0.005076168 | 2.7552168 |
| CD74 | 3.68E-04 | 2.7207403 |
| HERC6 | 0.008474189 | 2.667462 |
| S100A7 | 0.002414855 | 2.6631498 |
| TIMP1 | 2.02E-04 | 2.6311245 |
| TRANK1 | 3.21E-04 | 2.622139 |
| HCP5 | 6.13E-04 | 2.5529912 |
| SRGN | 0.002617153 | 2.534422 |
| COMP | 0.003683385 | 2.5196867 |
| EPSTI1 | 0.010101671 | 2.481738 |
| LAMP3 | 0.003952047 | 2.4813 |
| **IFIH1** | **0.006470816** | **2.4801283** |
| IFIT5 | 0.002603353 | 2.4563448 |
| IRF9 | 0.001143697 | 2.4170794 |
| HCP5 | 2.48E-04 | 2.3860571 |
| APOL6 | 2.89E-04 | 2.3820386 |
| HCP5 | 5.66E-05 | 2.379118 |
| KLHDC7B | 0.017683238 | 2.3550143 |
| POSTN | 0.030266296 | 2.3250093 |
| GXYLT2 | 0.002598586 | 2.2997758 |
| TRIM22 | 0.001251618 | 2.2954412 |
| RNA5SP496 | 0.02571847 | 2.2920403 |
| **TAP1** | **0.002641349** | **2.262116** |
| ANGPTL7 | 0.017445859 | 2.2584949 |
| PLSCR1 | 0.005648338 | 2.2584515 |
| LYZ | 0.006395585 | 2.2461894 |
| **GBP1** | **0.003091873** | **2.2371776** |
| RNF213 | 0.001666626 | 2.2134 |
| PI15 | 0.001473121 | 2.2001274 |
| CRLF1 | 0.006193886 | 2.1937847 |
| PARP12 | 0.003639223 | 2.1848032 |
| CD34 | 0.026563229 | 2.1724424 |
| COL12A1 | 4.99E-04 | 2.1567159 |
| RTP4 | 0.004356578 | 2.1429355 |
| SERPING1 | 0.001554808 | 2.1335585 |
| DDX58 | 0.010260572 | 2.1233811 |
| DUSP10 | 3.91E-04 | 2.1167195 |
| ITGB6 | 5.57E-04 | 2.116569 |
| MOXD1 | 3.90E-04 | 2.1155953 |
| SLC1A4 | 0.001301894 | 2.0960703 |
| IFITM2 | 0.019831406 | 2.089863 |
| CMPK2 | 0.03789973 | 2.0863094 |
| IFI30|PIK3R2 | 0.001319212 | 2.0801773 |
| RSAD2 | 0.028877055 | 2.0616915 |
| **TLR3** | 8.80E-05 | 2.0571094 |
| USP18 | 0.012837044 | 2.055822 |
| SP100 | 0.003191295 | 2.0476823 |
| GBP4 | 0.04487943 | 2.03319 |
| **C1R** | 9.39E-06 | 1.8530271 |
